# Supplementary material
Source: MDPI journal article supplement (https://www.mdpi.com/2227-9717/10/10/2152)

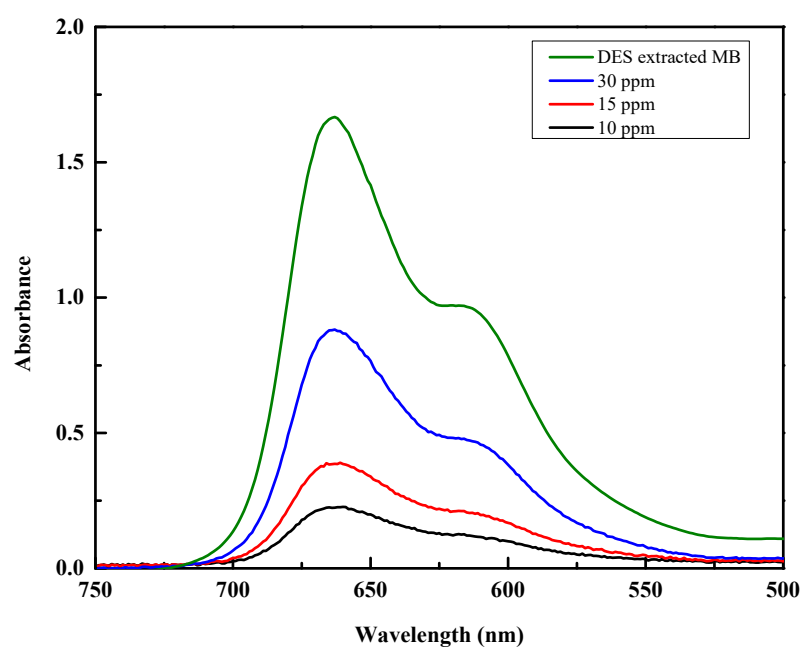

**Figure S1** Visible spectra of MB solutions in the presence and absence of TOP-SA.  $T = 25.0^{\circ}\text{C}$

Supplement: s1 [file s1]
